# Supplementary material
Source: PubMed Central journal article supplement (PMC7241937)
Supplement: nlaa034_supplementary_data.pdf [file nlaa034_supplementary_data.pdf]

**Supplementary table 1: Sorting Intolerant From Tolerant (SIFT) results**

| Gene ID         | Transcript ID   | Subst Type   | Region | Effect   | Confidence Score | Classification Path | Nucleotide change | Amino acid change       | Indel Location | Causes NMD | Transcript visualization        |
|-----------------|-----------------|--------------|--------|----------|------------------|---------------------|-------------------|-------------------------|----------------|------------|---------------------------------|
| ENSG00000133703 | ENST00000256078 | AA_INSERTION | CDS    | damaging | 0.894            | 3N_CP10             | gccta-CGC-cgcca   | VGAGGVGKSA->VGAGGgVGKSA | 7%             | NO         | <---{}--{}[]--[]--[*.]{}--{}--- |
| ENSG00000133703 | ENST00000311936 | AA_INSERTION | CDS    | damaging | 0.894            | 3N_CP10             | gccta-CGC-cgcca   | VGAGGVGKSA->VGAGGgVGKSA | 7%             | NO         | <---{}[]--[]--[*.]{}--{}---     |
| ENSG00000133703 | ENST00000556131 | AA_INSERTION | CDS    | damaging | 0.894            | 3N_CP10             | gccta-CGC-cgcca   | VGAGGVGKSA->VGAGGgVGKSA | 30%            | NO         | <---{}[]--[*.]{}--{}---         |
| ENSG00000133703 | ENST00000557334 | AA_INSERTION | CDS    | damaging | 0.894            | 3N_CP10             | gccta-CGC-cgcca   | VGAGGVGKSA->VGAGGgVGKSA | 18%            | NO         | <---{}[]--[*.]{}--{}---         |

| Gene | Gene Desc                                                                 | Protein Family ID | Protein Family Desc | Transcript Status | OMIM Disease | 1000 Genomes      |
|------|---------------------------------------------------------------------------|-------------------|---------------------|-------------------|--------------|-------------------|
| KRAS | v-Ki-ras2 Kirsten rat sarcoma viral oncogene homolog [Source:HGNC Symbol] | Acc:6407]         | ENSMF00500000269718 | RAS PRECURSOR     | 3            | NOONAN SYNDROME 3 |
| KRAS | v-Ki-ras2 Kirsten rat sarcoma viral oncogene homolog [Source:HGNC Symbol] | Acc:6407]         | ENSMF00500000269718 | RAS PRECURSOR     | 3            | NOONAN SYNDROME 3 |
